# Supplementary material for: Contrasting Soil Microbial Functional Potential for Phosphorus Cycling in Subtropical and Temperate Forests
Source: MDPI journal article supplement (doi:10.3390/f13122002), 2022-11-26
Supplement: s1 [file s1]

**Table S1.** Main characteristics of the sampling sites along the subtropical-temperate forest biomes in China

| Group                  | Parameters                     | Temperate forest biomes |          |          |          | Subtropical forest biomes |           |           |           | <i>p</i> |
|------------------------|--------------------------------|-------------------------|----------|----------|----------|---------------------------|-----------|-----------|-----------|----------|
|                        |                                | ME                      | DL       | FX       | HDT      | MX                        | GG        | AL        | ML        |          |
| Geographical condition | Latitude (N)                   | 45°41′                  | 39°97′   | 36°11′   | 33°43′   | 31°79′                    | 29°65′    | 23°87′    | 25°13′    | /        |
|                        | Longitude (E)                  | 127°71′                 | 115°43′  | 109°63′  | 108°45′  | 104°71′                   | 102°11′   | 103°51′   | 108°05′   | /        |
|                        | Elevation (m)                  | 600                     | 1300     | 1035     | 1526     | 1625                      | 1726      | 2300      | 652       | /        |
| Climate                | Mean Annual Temperature (°C)   | 3.10                    | 5.00     | 7.40     | 9.00     | 11.00                     | 13.00     | 18.30     | 19.38     | /        |
|                        | Mean Annual Precipitation (mm) | 629                     | 650      | 580      | 1023     | 486                       | 1000      | 1086      | 1529      | /        |
| Soil environment       | pH                             | 5.02±0.0                | 6.85±0.0 | 8.12±0.0 | 5.90±0.0 | 5.60±0.22                 | 6.20±0.01 | 5.94±0.08 | 6.71±0.60 | <0.001   |
|                        |                                | 7e                      | 3b       | 1a       | 1cd      | d                         | c         | cd        | b         |          |
|                        | BD (g·cm <sup>-3</sup> )       | 0.94±0.0                | 1.02±0.1 | 0.90±0.0 | 1.20±0.0 | 1.10±0.01                 | 0.81±0.01 | 1.12±0.07 | 0.83±0.07 | <0.001   |
|                        |                                | 1de                     | 1cd      | 1ef      | 1a       | bc                        | f         | ab        | f         |          |
|                        | Sand (%)                       | 63.77±5.                | 89.35±0. | 14.79±3. | 49.60±0. | 26.33±0.9                 | 33.07±2.5 | 24.02±1.5 | 14.45±0.5 | <0.001   |
|                        |                                | 51b                     | 01a      | 28f      | 01c      | 3e                        | 0d        | 3e        | 7f        |          |
|                        | Silt (%)                       | 23.93±3.                | 9.65±0.0 | 60.93±3. | 49.87±0. | 64.14±3.7                 | 4.97±0.21 | 62.58±1.4 | 64.56±0.5 | <0.001   |
|                        |                                | 62c                     | 1d       | 13a      | 01b      | 0a                        | e         | 4a        | 9a        |          |
| Soil substrates        | Clay (%)                       | 12.30±2.                | 1.00±0.0 | 24.28±1. | 0.53±0.0 | 9.52±3.45                 | 61.97±2.3 | 13.40±2.5 | 21.00±0.3 | <0.001   |
|                        |                                | 10cd                    | 1e       | 86b      | 1e       | d                         | a         | 6c        | 7b        |          |
|                        | SOC (g·kg <sup>-1</sup> )      | 99.33±1                 | 46.21±9. | 39.37±9. | 40.95±7. | 28.60±4.9                 | 38.92±10. | 36.37±4.9 | 52.88±10. | <0.001   |
|                        |                                | 0.46a                   | 60b      | 94bc     | 88bc     | 1c                        | 54bc      | 8bc       | 35b       |          |
|                        | TN (g·kg <sup>-1</sup> )       | 3.17±0.2                | 1.40±0.2 | 1.52±0.3 | 1.90±0.1 | 1.61±0.12                 | 2.28±0.18 | 2.56±0.35 | 4.72±0.83 | <0.001   |
|                        |                                | 5b                      | 3e       | 0e       | 9cde     | de                        | cd        | bc        | a         |          |
|                        | TP (g·kg <sup>-1</sup> )       | 1.07±0.0                | 0.82±0.0 | 0.64±0.0 | 0.39±0.0 | 0.39±0.13                 | 0.51±0.06 | 0.50±0.11 | 2.33±0.50 | <0.001   |
|                        |                                | 1b                      | 6bc      | 04cd     | 3d       | d                         | cd        | cd        | a         |          |
|                        | AP (mg·kg <sup>-1</sup> )      | 15.37±1.                | 2.73±0.3 | 1.87±0.9 | 4.43±1.8 | 4.83±14.6                 | 14.63±1.8 | 5.6±1.56c | 11.1±1.45 | <0.001   |
|                        |                                | 47a                     | 2de      | 9e       | 0cd      | 3cd                       | 0a        |           | b         |          |
|                        | C:N                            | 31.34±0.                | 33.40±8. | 27.45±1  | 21.53±3. | 17.67±2.0                 | 17.06±4.5 | 14.23±0.0 | 11.20±0.8 | 0.002    |
|                        |                                | 96ab                    | 49a      | 2.63ab   | 46bcd    | 2cd                       | 2cd       | 2d        | 8d        |          |
|                        | C:P                            | 92.55±1                 | 56.87±1  | 61.30±1  | 103.65±  | 82.24±40.                 | 76.90±24. | 76.19±22. | 23.74±8.7 | 0.012    |
|                        |                                | 0.35ab                  | 6.23bc   | 5.84bc   | 16.91a   | 63ab                      | 94ab      | 20ab      | 1c        |          |
|                        | N:P                            | 2.95±0.2                | 1.70±0.2 | 2.36±0.4 | 4.81±0.1 | 4.55±1.87                 | 4.45±0.31 | 5.35±1.56 | 2.09±0.60 | 0.001    |
|                        |                                | 5bc                     | 2c       | 5c       | 1a       | ab                        | ab        | a         | c         |          |

|                     |                     |                 |                 |                 |                 |                 |                  |                 |                  |                         |
|---------------------|---------------------|-----------------|-----------------|-----------------|-----------------|-----------------|------------------|-----------------|------------------|-------------------------|
| Microbial community | Fungal abundance    | 5.12±0.0<br>8a  | 4.18±0.4<br>3bc | 4.50±0.2<br>0b  | 4.39±0.3<br>2b  | 4.06±0.10<br>bc | 3.62±0.34<br>c   | 4.34±0.42<br>b  | 4.06±0.59<br>bc  | <b>0.00</b><br><b>5</b> |
|                     | Bacterial abundance | 7.90±0.1<br>1ab | 6.96±0.3<br>4ab | 8.06±0.2<br>1a  | 7.27±1.0<br>5ab | 7.19±0.21<br>ab | 6.62±0.85<br>b   | 7.43±0.51<br>ab | 7.07±1.21<br>ab  | 0.25                    |
|                     | F:B                 | 0.65±0.0<br>2a  | 0.60±0.0<br>3ab | 0.56±0.0<br>2b  | 0.61±0.0<br>5ab | 0.56±0.02<br>b  | 0.55±0.05<br>b   | 0.58±0.02<br>b  | 0.58±0.02<br>b   | <b>0.02</b><br><b>5</b> |
|                     | α-diversity         | 1.79±0.0<br>9ab | 1.60±0.0<br>5bc | 1.86±0.1<br>0a  | 1.55±0.2<br>2c  | 1.25±0.06<br>d  | 1.65±0.06<br>abc | 1.29±0.21<br>d  | 1.68±0.02<br>abc | <b>&lt;0.001</b>        |
|                     | β-diversity         | 0c              | 0.24±0.0<br>9ab | 0.26±0.0<br>5ab | 0.24±0.0<br>8ab | 0.26±0.05<br>ab | 0.18±0.08<br>b   | 0.37±0.05<br>a  | 0.25±0.12<br>ab  | <b>0.00</b><br><b>1</b> |
|                     |                     |                 |                 |                 |                 |                 |                  |                 |                  |                         |
|                     |                     |                 |                 |                 |                 |                 |                  |                 |                  |                         |
|                     |                     |                 |                 |                 |                 |                 |                  |                 |                  |                         |
|                     |                     |                 |                 |                 |                 |                 |                  |                 |                  |                         |
|                     |                     |                 |                 |                 |                 |                 |                  |                 |                  |                         |

ME, Maoer Mountain; DL, Dongling Mountain; FX, Fuxian; HDT, Huoditang; MX, Maoxian; GG, Gongga Mountain; AL, Ailao Mountain; ML, Karst Mulun station. MAT, mean annual temperature; MAP, mean annual precipitation; BD, bulk density; SOC, soil organic carbon; TN, soil total nitrogen; TP, soil total phosphorus; AP, available phosphorus; C:N, the ratio of soil organic carbon to total nitrogen; C:P, the ratio of soil organic carbon to total phosphorus; N:P, the ratio of soil total nitrogen to total phosphorus; F:B, the ratio of fungal abundance-to-bacterial abundance. Values presented are means±SD (n=3), letters after means±SD indicate significant differences at  $p<0.05$  using LSD (L) and Duncan(D) tests. Values in bold are statistically significant at  $p<0.05$ .

**Table S2.** Summary of the metagenome sequencing of 24 composite samples across forest biomes.

| Fore<br>st<br>site | Raw<br>reads | HQ<br>Rea<br>ds<br>(%) | GC<br>(%) | Q<br>20(<br>%) | Q3<br>0<br>(%) | Contigs       |             |             |                     | Scaffolds     |             |                     |                     |
|--------------------|--------------|------------------------|-----------|----------------|----------------|---------------|-------------|-------------|---------------------|---------------|-------------|---------------------|---------------------|
|                    |              |                        |           |                |                | Total<br>(bp) | Max(b<br>p) | Min(b<br>p) | N5<br>0<br>(b<br>p) | Total<br>(bp) | Max(b<br>p) | Mi<br>n<br>(b<br>p) | N5<br>0<br>(b<br>p) |
| ME1                | 800544       | 99.9                   | 63.       | 98.0           | 94.            | 15815         | 50299       | 200         | 43                  | 15669         | 50299       | 20                  | 43                  |
|                    | 32           | 2                      | 45        | 9              | 51             | 40            |             |             | 4                   | 69            |             | 0                   | 6                   |
| ME2                | 812155       | 99.9                   | 63.       | 97.8           | 93.            | 15337         | 11858       | 200         | 44                  | 15177         | 13304       | 20                  | 44                  |
|                    | 34           | 0                      | 26        | 2              | 95             | 20            |             |             | 2                   | 74            |             | 0                   | 5                   |
| ME3                | 842551       | 99.9                   | 63.       | 98.3           | 95.            | 20661         | 19298       | 200         | 42                  | 20594         | 19298       | 20                  | 42                  |
|                    | 80           | 4                      | 87        | 6              | 26             | 67            |             |             | 5                   | 76            |             | 0                   | 6                   |
| DL1                | 805422       | 99.8                   | 63.       | 97.8           | 94.            | 15662         | 9623        | 200         | 42                  | 15543         | 9816        | 20                  | 42                  |
|                    | 94           | 8                      | 94        | 6              | 08             | 92            |             |             | 6                   | 50            |             | 0                   | 8                   |
| DL2                | 822465       | 99.8                   | 63.       | 97.9           | 94.            | 17725         | 30057       | 200         | 44                  | 17501         | 52621       | 20                  | 45                  |
|                    | 66           | 9                      | 85        | 1              | 18             | 77            | 8           |             | 9                   | 73            | 1           | 0                   | 3                   |
| DL3                | 815351       | 99.9                   | 64.       | 97.8           | 94.            | 14984         | 10853       | 200         | 43                  | 14836         | 12556       | 20                  | 43                  |
|                    | 10           | 0                      | 36        | 6              | 07             | 86            |             |             | 5                   | 99            |             | 0                   | 7                   |
| FX1                | 912668       | 99.8                   | 64.       | 97.8           | 94.            | 24653         | 61327       | 200         | 47                  | 24233         | 61834       | 20                  | 48                  |
|                    | 42           | 8                      | 54        | 6              | 08             | 49            |             |             | 8                   | 58            |             | 0                   | 4                   |
| FX2                | 853437       | 99.8                   | 64.       | 97.9           | 94.            | 22907         | 37221       | 200         | 49                  | 22512         | 64337       | 20                  | 50                  |
|                    | 40           | 9                      | 18        | 4              | 27             | 86            | 5           |             | 3                   | 25            | 0           | 0                   | 0                   |
| FX3                | 855071       | 99.8                   | 64.       | 98.0           | 94.            | 23421         | 14238       | 200         | 49                  | 23024         | 19039       | 20                  | 50                  |
|                    | 22           | 8                      | 34        | 6              | 61             | 18            | 5           |             | 5                   | 63            | 6           | 0                   | 2                   |
| HD                 | 723043       | 99.8                   | 63.       | 97.8           | 93.            | 11296         | 42100       | 200         | 42                  | 11175         | 42100       | 20                  | 42                  |
| T1                 | 92           | 8                      | 24        | 4              | 96             | 31            |             |             | 3                   | 48            |             | 0                   | 6                   |
| HD                 | 780069       | 99.9                   | 62.       | 97.7           | 93.            | 14214         | 20797       | 200         | 43                  | 14042         | 35023       | 20                  | 43                  |
| T2                 | 54           | 0                      | 44        | 0              | 63             | 78            |             |             | 6                   | 96            |             | 0                   | 9                   |
| HD                 | 796206       | 99.8                   | 60.       | 97.9           | 94.            | 19710         | 69135       | 200         | 53                  | 19334         | 71137       | 20                  | 54                  |
| T3                 | 46           | 9                      | 97        | 2              | 14             | 89            |             |             | 6                   | 60            |             | 0                   | 6                   |
| MX                 | 835531       | 99.9                   | 62.       | 98.0           | 94.            | 23275         | 34488       | 200         | 60                  | 22573         | 38663       | 20                  | 62                  |
| 1                  | 10           | 1                      | 65        | 4              | 38             | 17            | 6           |             | 5                   | 02            | 7           | 0                   | 7                   |
| MX                 | 744530       | 99.8                   | 61.       | 97.7           | 93.            | 19102         | 20866       | 200         | 55                  | 18554         | 32346       | 20                  | 56                  |
| 2                  | 44           | 9                      | 60        | 7              | 80             | 11            | 9           |             | 0                   | 34            | 5           | 0                   | 6                   |
| MX                 | 826831       | 99.9                   | 62.       | 98.2           | 94.            | 26291         | 11218       | 200         | 49                  | 26015         | 11218       | 20                  | 49                  |
| 3                  | 92           | 4                      | 37        | 6              | 96             | 69            | 7           |             | 5                   | 37            | 7           | 0                   | 9                   |
| GG1                | 850953       | 99.8                   | 64.       | 97.8           | 93.            | 15964         | 21731       | 200         | 42                  | 15847         | 21731       | 20                  | 42                  |
|                    | 26           | 6                      | 85        | 0              | 98             | 32            |             |             | 1                   | 10            |             | 0                   | 3                   |
| GG2                | 812757       | 99.8                   | 63.       | 97.8           | 94.            | 13003         | 37744       | 200         | 41                  | 12897         | 37744       | 20                  | 42                  |
|                    | 62           | 8                      | 47        | 8              | 09             | 87            |             |             | 9                   | 52            |             | 0                   | 1                   |
| GG3                | 785315       | 99.8                   | 63.       | 97.8           | 93.            | 14611         | 46859       | 200         | 43                  | 14440         | 65355       | 20                  | 44                  |
|                    | 36           | 8                      | 54        | 0              | 93             | 72            |             |             | 7                   | 90            |             | 0                   | 0                   |

|     |        |      |     |      |     |       |       |     |    |       |       |    |    |
|-----|--------|------|-----|------|-----|-------|-------|-----|----|-------|-------|----|----|
| AL1 | 886388 | 99.8 | 63. | 97.8 | 94. | 22996 | 12956 | 200 | 61 | 22322 | 15144 | 20 | 63 |
|     | 76     | 7    | 67  | 8    | 14  | 59    | 9     |     | 2  | 28    | 0     | 0  | 3  |
| AL2 | 915376 | 99.8 | 63. | 97.8 | 94. | 24214 | 56896 | 200 | 52 | 23638 | 56896 | 20 | 53 |
|     | 20     | 7    | 79  | 7    | 09  | 94    |       |     | 3  | 24    |       | 0  | 3  |
| AL3 | 903682 | 99.8 | 63. | 98.0 | 94. | 20478 | 16266 | 200 | 54 | 20008 | 16266 | 20 | 55 |
|     | 40     | 8    | 22  | 2    | 48  | 37    | 3     |     | 5  | 68    | 3     | 0  | 6  |
| ML1 | 872183 | 99.9 | 63. | 98.1 | 94. | 18360 | 37857 | 200 | 45 | 18070 | 39589 | 20 | 45 |
|     | 92     | 4    | 98  | 5    | 63  | 42    |       |     | 3  | 02    |       | 0  | 8  |
| ML2 | 103656 | 99.9 | 63. | 97.9 | 94. | 26424 | 71490 | 200 | 45 | 26094 | 71490 | 20 | 46 |
|     | 100    | 1    | 70  | 9    | 40  | 34    |       |     | 9  | 84    |       | 0  | 2  |
| ML3 | 886419 | 99.9 | 64. | 98.1 | 94. | 23930 | 61600 | 200 | 47 | 23582 | 61600 | 20 | 48 |
|     | 44     | 5    | 16  | 9    | 72  | 64    |       |     | 4  | 29    |       | 0  | 0  |

**Table S3.** Abundance of 40 phosphorus functional genes along the subtropical-temperate forest biomes in China.

| Gene name                     |      | ME       | DL       | FX       | HDT     | MX       | GG       | AL       | ML       |
|-------------------------------|------|----------|----------|----------|---------|----------|----------|----------|----------|
| <b>P-starvation response</b>  | phoU | 219.17±  | 212.37±  | 199.93±  | 208.57± | 190.46±  | 225.83±  | 178.61±  | 173.84±  |
|                               |      | 25.80    | 6.66     | 30.04    | 16.07   | 17.41    | 10.75    | 13.44    | 15.05    |
| <b>regulation</b>             | phoR | 239.87±  | 223.44±  | 301.06±  | 245.52± | 210.43±  | 248.54±  | 211.74±  | 246.45±  |
|                               |      | 5.42     | 18.22    | 18.48    | 13.48   | 27.02    | 29.20    | 70.93    | 25.04    |
|                               | phoB | 128.79±  | 133.80±  | 145.00±  | 130.33± | 101.91±  | 139.81±  | 118.28±  | 114.53±  |
|                               |      | 12.23    | 11.87    | 17.44    | 41.73   | 21.60    | 14.11    | 21.24    | 13.98    |
| <b>P-uptake and transport</b> | ugpB | 110.40±  | 94.82±6. | 71.08±1  | 100.12± | 49.22±1  | 139.58±  | 103.24±  | 95.39±2  |
|                               |      | 23.9     | 98       | 2.05     | 52.02   | 7.85     | 9.40     | 28.82    | 1.98     |
|                               | ugpA | 56.86±1  | 41.87±1  | 38.11±5. | 57.88±3 | 24.64±8. | 74.43±8. | 51.53±8. | 48.26±1  |
|                               |      | 3.82     | 6.59     | 61       | 0.59    | 94       | 78       | 70       | 3.56     |
|                               | ugpE | 63.55±6. | 47.93±1  | 42.37±9. | 57.15±3 | 23.53±9. | 74.49±1  | 50.03±1  | 51.99±9. |
|                               |      | 81       | 3.67     | 67       | 4.29    | 15       | 4.62     | 6.01     | 83       |
|                               | ugpC | 58.51±1  | 43.94±1  | 31.93±3. | 51.18±1 | 25.34±7. | 66.01±1  | 49.40±1  | 39.67±1  |
|                               |      | 1.56     | 7.59     | 86       | 8.26    | 99       | 5.32     | 9.54     | 1.46     |
|                               | phnC | 45.61±9. | 45.81±6. | 64.99±1  | 64.16±2 | 34.20±1  | 44.67±7. | 60.45±1  | 56.05±9. |
|                               |      | 86       | 67       | 9.04     | 9.88    | 1.27     | 46       | 8.49     | 54       |
|                               | phnE | 63.30±4. | 68.15±1  | 96.04±2  | 87.69±3 | 39.55±1  | 66.93±1  | 96.63±3  | 76.47±1  |
|                               |      | 58       | 0.39     | 2.61     | 7.57    | 2.53     | 3.54     | 2.43     | 3.14     |
|                               | phnD | 74.49±1  | 72.68±1  | 116.75±  | 100.62± | 45.77±9. | 73.05±1  | 94.92±2  | 117.95±  |
|                               |      | 1.27     | 7.99     | 22.08    | 60.98   | 01       | 3.20     | 6.24     | 8.88     |
|                               | pstB | 241.73±  | 279.78±  | 237.77±  | 215.60± | 183.93±  | 289.93±  | 200.26±  | 196.94±  |
|                               |      | 28.93    | 18.05    | 10.61    | 51.54   | 13.19    | 47.89    | 29.57    | 14.08    |
|                               | pstC | 227.47±  | 248.25±  | 234.57±  | 203.05± | 165.62±  | 233.89±  | 201.08±  | 190.39±  |
|                               |      | 30.94    | 5.11     | 10.94    | 62.6    | 5.88     | 23.70    | 18.68    | 12.80    |
|                               | pstA | 184.34±  | 196.12±  | 220.88±  | 173.51± | 135.79±  | 206.23±  | 164.00±  | 171.11±  |
|                               |      | 11.21    | 7.21     | 12.11    | 37.25   | 4.24     | 38.84    | 16.00    | 10.77    |

|                                       |      |               |              |               |               |              |               |               |               |
|---------------------------------------|------|---------------|--------------|---------------|---------------|--------------|---------------|---------------|---------------|
| P-solubilization and P-mineralization | pstS | 263.63±16.38  | 299.75±40.4  | 329.32±21.13  | 278.24±16.81  | 264.77±14.58 | 286.78±54.14  | 307.26±9.46   | 228.75±8.78   |
|                                       | pit  | 229.02±11.27  | 206.81±25.83 | 76.10±5.46    | 183.95±36.21  | 166.99±30.71 | 275.55±57.89  | 189.66±18.23  | 167.22±13.57  |
|                                       | gcd  | 652.73±124.97 | 431.85±73.18 | 556.68±105.35 | 567.09±255.31 | 435.24±63.12 | 623.38±157.65 | 416.37±166.02 | 819.86±124.43 |
|                                       | phnN | 3.91±2.12     | 7.72±7.08    | 5.75±2.53     | 7.78±7.39     | 6.59±3.31    | 4.49±3.36     | 15.68±7.35    | 5.06±2.13     |
|                                       | phnL | 5.95±2.88     | 12.8±2.64    | 8.15±1.38     | 16.07±9.89    | 9.60±3.20    | 5.72±1.29     | 19.95±1.04    | 6.93±3.66     |
|                                       | phnK | 10.04±3.80    | 16.24±5.34   | 12.68±0.94    | 18.51±4.15    | 12.87±6.02   | 9.74±3.74     | 25.17±1.15    | 10.33±3.20    |
|                                       | phnO | 0.00±0.00     | 0.00±0.00    | 1.54±0.58     | 0.00±0.00     | 0.33±0.00    | 0.00±0.00     | 0.27±0.00     | 0.13±0.00     |
|                                       | phnM | 18.41±9.74    | 24.37±8.3    | 18.75±2.88    | 34.39±1.764   | 30.00±1.802  | 15.36±3.56    | 54.94±3.156   | 16.89±0.69    |
|                                       | phnJ | 11.38±3.45    | 23.47±3.33   | 14.82±3.21    | 21.29±2.72    | 19.12±3.36   | 16.23±8.02    | 28.46±1.503   | 11.46±2.64    |
|                                       | phnI | 10.81±4.77    | 23.84±7.14   | 16.11±2.63    | 24.47±1.044   | 16.75±8.73   | 15.22±2.59    | 35.17±1.746   | 10.70±3.60    |
|                                       | phnH | 4.13±0.87     | 9.93±3.4     | 6.81±1.77     | 8.54±3.56     | 6.85±4.92    | 5.54±3.71     | 18.37±1.175   | 4.26±1.76     |
|                                       | phnG | 5.34±3.96     | 7.93±1.49    | 6.70±0.55     | 8.62±5.66     | 6.77±3.41    | 4.49±2.14     | 20.36±1.399   | 3.19±1.77     |
|                                       | phnP | 53.22±8.12    | 59.01±7.91   | 69.32±2.006   | 74.18±2.325   | 76.71±1.549  | 66.46±1.676   | 69.76±9.52    | 46.28±5.22    |
|                                       | phnF | 3.05±2.17     | 9.37±5.94    | 4.48±1.37     | 10.12±7.45    | 13.35±7.53   | 6.70±3.80     | 28.52±1.663   | 3.04±0.70     |
|                                       | ppx  | 304.22±39.43  | 349.64±36.98 | 338.89±9.91   | 302.51±55.71  | 254.59±5.32  | 374.97±16.74  | 287.50±22.05  | 309.23±11.45  |
|                                       | ppa  | 101.61±18.61  | 149.39±20    | 130.04±18.95  | 96.63±9.92    | 155.98±6.78  | 149.58±47.13  | 170.29±5.45   | 101.90±15.07  |
|                                       | phnA | 2.31±1.86     | 4.14±5.06    | 2.77±3.80     | 1.51±0.47     | 1.80±1.46    | 1.31±0.84     | 6.46±5.69     | 1.68±0.00     |
|                                       | phnX | 1.35±1.28     | 5.07±2.66    | 3.93±2.31     | 5.71±4.34     | 11.32±0.66   | 1.51±2.08     | 6.22±5.20     | 2.63±1.25     |
|                                       | phnW | 35.42±1.76    | 26.74±5.01   | 31.61±3.05    | 38.86±1.944   | 17.50±1.068  | 41.94±1.32    | 26.80±1.096   | 43.86±6.72    |
|                                       | appA | 3.36±4.05     | 2.42±0.63    | 1.49±2.23     | 5.01±1.48     | 5.85±2.17    | 5.29±1.50     | 5.74±5.72     | 5.67±1.22     |
|                                       | opd  | 86.43±3.298   | 63.70±1.425  | 95.53±1.383   | 80.31±2.868   | 51.45±1.158  | 93.50±1.604   | 62.25±1.901   | 100.01±2.96   |

|      |                  |                  |                  |                   |                  |                  |                  |                  |
|------|------------------|------------------|------------------|-------------------|------------------|------------------|------------------|------------------|
| ugpQ | 205.47±<br>10.56 | 255.45±<br>5.47  | 318.06±<br>11.37 | 195.96±<br>38.37  | 157.81±<br>20.82 | 236.70±<br>38.38 | 237.31±<br>30.94 | 210.89±<br>10.51 |
| phoA | 70.38±7.<br>63   | 54.78±1<br>5.15  | 51.37±1<br>8.54  | 58.23±2<br>8.65   | 14.67±9.<br>99   | 41.56±2<br>0.56  | 63.84±3<br>5.42  | 79.10±1<br>1.81  |
| phoD | 237.86±<br>61.26 | 313.73±<br>59.95 | 274.27±<br>17.15 | 209.16±<br>122.65 | 92.21±2<br>5.38  | 293.71±<br>44.64 | 247.14±<br>89.36 | 259.47±<br>28.67 |
| phoN | 9.09±3.2<br>6    | 7.76±6.2<br>7    | 2.90±1.7<br>0    | 9.54±2.0<br>9     | 14.39±2.<br>76   | 73.4±1.0<br>1    | 13.88±3.<br>00   | 6.35±0.3<br>4    |
| aphA | 0.00±0.0<br>0    | 0.00±0.0<br>0    | 0.25±0.0<br>0    | 0.51±0.3<br>9     | 0.00±0.0<br>0    | 0.95±0.0<br>0    | 0.70±0.3<br>7    | 0.21±0.1<br>6    |
| olpA | 11.70±6.<br>33   | 8.97±2.9<br>5    | 4.77±1.2<br>2    | 20.36±1<br>5.69   | 35.60±1.<br>84   | 14.67±1<br>1.00  | 13.51±1<br>1.08  | 7.84±2.8<br>5    |

**Table S4.** Changes in the abundance of three major classes of phosphorus functional genes along the subtropical-temperate forest biomes of China.

| Gene name  | ME       | DL       | FX       | HDT      | MX       | GG       | AL       | ML       | <i>p</i>   |
|------------|----------|----------|----------|----------|----------|----------|----------|----------|------------|
| P-starvati |          |          |          |          |          |          |          |          |            |
| on         | 587±13.7 | 569.61±2 | 645.99±3 | 584.43±4 | 502.82±4 | 613.87±2 | 508.63±6 | 534.82±2 | <b>0.0</b> |
| respons    | 6abc     | 2.49bcd  | 8.28a    | 4.72abc  | 5.11d    | 1.55ab   | 4.21d    | 8.00cd   | <b>03</b>  |
| e          |          |          |          |          |          |          |          |          |            |
| regulati   |          |          |          |          |          |          |          |          |            |
| on         |          |          |          |          |          |          |          |          |            |
| P-         |          |          |          |          |          |          |          |          |            |
| uptake     | 1618.91± | 1645.90± | 1559.90± | 1573.14± | 1159.35± | 1831.47± | 1568.55± | 1440.18± | <b>0.0</b> |
| and        | 14.77ab  | 69.27ab  | 47.45b   | 276.11b  | 67.47c   | 178.45a  | 71.66b   | 77.63b   | <b>01</b>  |
| transpor   |          |          |          |          |          |          |          |          |            |
| t          |          |          |          |          |          |          |          |          |            |
| P-         |          |          |          |          |          |          |          |          |            |
| solubiliz  |          |          |          |          |          |          |          |          |            |
| ation      | 1848.29± | 1868.10± | 1977.19± | 1814.85± | 1447.13± | 2035.71± | 1874.46± | 2065.68± | <b>0.0</b> |
| and        | 186.17a  | 81.39a   | 117.76a  | 309.70a  | 97.89b   | 169.00a  | 153.76a  | 103.74a  | <b>11</b>  |
| minerali   |          |          |          |          |          |          |          |          |            |
| zation     |          |          |          |          |          |          |          |          |            |

Values presented are means±SD (n=3), letters after means±SD indicate significant differences at  $p<0.05$  using LSD (L) and Duncan(D) tests.

**Table S5.** The average abundance of three major classes of phosphorus functional genes among temperate and subtropical forest biomes.

| Gene name                           | Temperate forest<br>biomes | Subtropical forest<br>biomes | <i>P</i>     |
|-------------------------------------|----------------------------|------------------------------|--------------|
| P-starvation response regulation    | 596.96±17.67               | 540.03±22.49                 | <b>0.026</b> |
| P-uptake and transport              | 1599.47±73.05              | 1499.89±58.86                | 0.14         |
| P-solubilization and mineralization | 1877.18±105.32             | 1855.75±69.47                | 0.78         |
| Total                               | 4073.61±185.92             | 3895.67±127.67               | 0.24         |

Values in bold are statistically significant at  $P<0.05$ .

**Table S6.** Abundance of phosphorus functional genes corresponding to phyla along the subtropical-temperate forest biomes of China.

[illegible]

|                        |                     |             |                    |           |                     |           |           |                    |           |
|------------------------|---------------------|-------------|--------------------|-----------|---------------------|-----------|-----------|--------------------|-----------|
| P-uptake and transport | Raymondbacteria     |             |                    |           |                     |           |           |                    | 0.33 a    |
|                        | Candidatus          | 86 ±        | 35.67 ±            | 128 ±     | 96 ±                | 15.67 ±   | 75.67 ±   | 33.33 ±            | 194.33 ±  |
|                        | Rokubacteria        | 19.97 bc    | 5.55 de            | 22.81 b   | 20.88 bc            | 0.88 e    | 3.93 cd   | 3.71 de            | 22.58 a   |
|                        | Candidatus          | 1 ± 0.58    |                    |           |                     |           |           |                    | 0.33 ±    |
|                        | Tectomicrobia       | a           | 0 ± 0 b            | 0 ± 0 b   | 0 ± 0 b             | 0 ± 0 b   | 0 ± 0 b   | 0 ± 0 b            | 0.33 ab   |
|                        | Chloroflexi         | 19 ±        | 22.33 ±            | 85 ±      | 10 ± 4 b            | 5.67 ±    | 21 ± 7.51 | 32 ±               | 11.33 ±   |
|                        |                     | 2.52 b      | 4.91 b             | 20.07 a   |                     | 1.86 b    | b         | 27.06 b            | 3.84 b    |
|                        | Cyanobacteria       | 0.67 ±      |                    |           |                     |           |           |                    |           |
|                        |                     | 0.67 a      | 0 ± 0 a            | 0 ± 0 a   | 0 ± 0 a             | 0 ± 0 a   | 0 ± 0 a   | 0 ± 0 a            | 0 ± 0 a   |
|                        | Deinococcus-Thermus | 0.67 ±      | 0.33 ±             |           |                     |           |           |                    |           |
|                        |                     | 0.67 a      | 0.33 a             | 0 ± 0 a   | 0 ± 0 a             | 0 ± 0 a   | 0 ± 0 a   | 0 ± 0 a            | 0 ± 0 a   |
|                        | Euryarchaeota       | 0.33 ±      |                    | 0.33 ±    |                     |           |           |                    |           |
|                        |                     | 0.33 a      | 0 ± 0 a            | 0.33 a    | 0 ± 0 a             | 0 ± 0 a   | 0 ± 0 a   | 0 ± 0 a            | 0 ± 0 a   |
|                        | Firmicutes          | 5.67 ±      | 1.33 ±             | 0.67 ±    | 0.33 ±              | 4.67 ±    | 0.67 ±    |                    | 1 ± 0.58  |
|                        |                     | 2.4 a       | 1.33 ab            | 0.67 b    | 0.33 b              | 3.28 ab   | 0.67 b    | 0 ± 0 b            | ab        |
|                        | Gemmatimonadetes    | 28 ±        | 70 ±               | 263 ±     | 40.33 ±             | 27 ± 5.03 | 75.33 ±   | 61.67 ±            | 35.67 ±   |
|                        | Ignavibacteriae     | 11.14 b     | 12.17 b            | 98.81 a   | 12.88 b             | b         | 24.13 b   | 5.55 b             | 3.84 b    |
|                        |                     | 1.67 ±      | 0.67 ±             | 2.67 ±    | 1.33 ±              |           | 0.67 ±    |                    | 13.33 ±   |
|                        |                     | 0.88 b      | 0.67 b             | 1.2 b     | 0.67 b              | 0 ± 0 b   | 0.67 b    | 1 ± 1 b            | 1.67 a    |
|                        | Nitrospinae         | 2.33 ±      | 1.67 ±             |           |                     | 1.67 ±    |           | 0.67 ±             | 3.67 ±    |
|                        |                     | 1.2 ab      | 1.2 ab             | 0 ± 0 b   | 0 ± 0 b             | 1.2 ab    | 0 ± 0 b   | 0.67 ab            | 2.19 a    |
|                        | Nitrospirae         | 21.33 ±     | 1.67 ±             | 6.67 ±    | 30 ±                |           | 21.33 ±   |                    | 54.67 ±   |
|                        |                     | 6.33 bc     | 0.88 c             | 2.91 c    | 18.33 b             | 1 ± 1 c   | 2.91 bc   | 0 ± 0 c            | 7.36 a    |
|                        | Planctomycetes      | 25 ±        | 8.33 ±             | 26 ±      | 11 ± 3.21           | 51.67 ±   | 12 ± 1.15 | 21.33 ±            | 32.33 ±   |
|                        |                     | 7.51 bc     | 1.76 c             | 3.51 bc   | c                   | 10.53 a   | c         | 5.78 bc            | 9.94 b    |
|                        | Proteobacteria      | 594 ±       | 617.33 ±           | 627.67 ±  | 521.33 ±            | 694.33 ±  | 547 ±     | 1192.33            | 642.33 ±  |
|                        |                     | 63.61 b     | 33.17 b            | 93.9 b    | 48.59 b             | 55.38 b   | 32.87 b   | ± 248.39 a         | 66.41 b   |
|                        | Verrucomicrobia     | 354 ±       | 104 ±              | 49.67 ±   | 161.33 ±            | 124 ±     | 19.67 ±   | 186.67 ±           | 118.33 ±  |
|                        | 76.71 a             | 18.56 bcd   | 30.69 cd           | 70.05 bc  | 30.66 bcd           | 2.4 d     | 28.35 b   | 11.02 bcd          |           |
| P-uptake and transport | Acidobacteria       | 724.33 ±    | 579 ±              | 1148 ±    | 1475.33 ± 921.49 ab | 1942 ±    | 733.33 ±  | 1324 ±             | 1045 ±    |
|                        |                     | 90.39 b     | 79.48 b            | 78.08 ab  |                     | 68.15 a   | 95.49 b   | 297.06 ab          | 131.93 ab |
|                        | Actinobacteria      | 893 ±       | 1456.67 ± 160.21 a | 1268 ±    | 201.33 ±            | 621 ±     | 754.67 ±  | 1413.67 ± 135.69 a | 317.67 ±  |
|                        |                     | 57.81 bc    |                    | 246.87 ab | 43.05 e             | 161.6 cd  | 56.78 c   |                    | 73.94 de  |
|                        | Aquificae           | 1 ± 0.58 a  | 2 ± 1.15 a         | 0 ± 0 a   | 2.33 ±              | 2 ± 2 a   | 0.33 ±    | 1.67 ±             | 0 ± 0 a   |
|                        |                     |             |                    |           | 1.45 a              |           | 0.33 a    | 0.88 a             |           |
|                        | Armatimonadetes     | 9 ± 2.31 ab | 11.33 ±            | 11.67 ±   | 4.33 ±              | 0.33 ±    | 7.67 ±    | 4.67 ±             | 1.67 ±    |
|                        |                     |             | 5.17 a             | 3.93 a    | 4.33 ab             | 0.33 b    | 4.06 ab   | 3.71 ab            | 0.88 ab   |



|                                                |                    |                   |                    |                    |                   |                   |                    |                    |
|------------------------------------------------|--------------------|-------------------|--------------------|--------------------|-------------------|-------------------|--------------------|--------------------|
| <i>Bacteroidetes</i>                           | 25 ±<br>2.89 a     | 24 ±<br>13.23 a   | 17.67 ±<br>1.86 ab | 12 ± 6.81<br>ab    | 8.33 ±<br>3.28 ab | 6.67 ±<br>2.19 b  | 13.33 ±<br>2.91 ab | 8 ± 1.53<br>ab     |
| <i>Balneolaeota</i>                            | 0 ± 0 a            | 0.33 ±<br>0.33 a  | 0 ± 0 a            | 0 ± 0 a            | 0 ± 0 a           | 0 ± 0 a           | 0 ± 0 a            | 0 ± 0 a            |
| <i>Calditrichaeot<br/>a</i>                    | 6.67 ±<br>2.6 bc   | 8.33 ±<br>1.67 bc | 30 ±<br>1.53 a     | 5.33 ±<br>2.67 bc  | 1.67 ±<br>1.67 c  | 5.67 ±<br>4.26 bc | 4 ± 3.06<br>bc     | 12.33 ±<br>4.48 b  |
| <i>Candidate<br/>division AD3</i>              | 0.33 ±<br>0.33 a   | 0 ± 0 a           | 0 ± 0 a            | 0 ± 0 a            | 0 ± 0 a           | 0 ± 0 a           | 0 ± 0 a            | 0 ± 0 a            |
| <i>Candidate<br/>division<br/>NC10</i>         | 28.33 ±<br>7.88 bc | 13 ±<br>3.46 cd   | 48 ±<br>10.58 a    | 16.67 ±<br>2.85 cd | 2.33 ±<br>1.86 d  | 13.67 ±<br>4.1 cd | 6.67 ±<br>1.33 d   | 33.33 ±<br>2.73 ab |
| <i>Candidate<br/>division<br/>WOR-3</i>        | 1.33 ±<br>1.33 ab  | 0.33 ±<br>0.33 ab | 0 ± 0 b            | 0 ± 0 b            | 2.33 ±<br>1.45 a  | 0 ± 0 b           | 0 ± 0 b            | 0 ± 0 b            |
| <i>Candidate<br/>division<br/>WPS-2</i>        | 1 ± 0.58<br>a      | 0.67 ±<br>0.67 a  | 0.67 ±<br>0.67 a   | 1 ± 0.58<br>a      | 1.33 ±<br>0.67 a  | 0.67 ±<br>0.67 a  | 0.67 ±<br>0.67 a   | 0 ± 0 a            |
| <i>Candidate<br/>division<br/>Zixibacteria</i> | 5.33 ±<br>2.4 a    | 3.33 ±<br>1.86 a  | 5.33 ±<br>2.33 a   | 2 ± 1 a            | 1.67 ±<br>0.88 a  | 1.33 ±<br>0.33 a  | 2 ± 1 a            | 4.67 ±<br>2.33 a   |
| <i>Candidatus<br/>Abyssobacteri<br/>a</i>      | 0.67 ±<br>0.33 a   | 0 ± 0 a           | 0 ± 0 a            | 0.67 ±<br>0.67 a   | 0 ± 0 a           | 0 ± 0 a           | 0.67 ±<br>0.67 a   | 1.33 ±<br>0.88 a   |
| <i>Candidatus<br/>Aminicenante<br/>s</i>       | 2 ± 0.58<br>ab     | 3 ± 0.58<br>a     | 0.67 ±<br>0.67 c   | 0 ± 0 c            | 0 ± 0 c           | 0 ± 0 c           | 0.33 ±<br>0.33 c   | 1 ± 0.58<br>bc     |
| <i>Candidatus<br/>Aureabacteria</i>            | 1 ± 1 ab           | 0 ± 0 b           | 0 ± 0 b            | 0 ± 0 b            | 2.33 ±<br>1.2 a   | 0.33 ±<br>0.33 b  | 0 ± 0 b            | 0.33 ±<br>0.33 b   |
| <i>Candidatus<br/>Bathyarchaeot<br/>a</i>      | 0.67 ±<br>0.67 a   | 0 ± 0 a           | 0 ± 0 a            | 0 ± 0 a            | 0 ± 0 a           | 0 ± 0 a           | 0 ± 0 a            | 0 ± 0 a            |
| <i>Candidatus<br/>Cloacimonete<br/>s</i>       | 0.33 ±<br>0.33 a   | 0 ± 0 a           | 0.67 ±<br>0.67 a   | 0 ± 0 a            | 0 ± 0 a           | 0.33 ±<br>0.33 a  | 0 ± 0 a            | 0 ± 0 a            |
| <i>Candidatus<br/>Coatesbacteri<br/>a</i>      | 0 ± 0 a            | 0.33 ±<br>0.33 a  | 0 ± 0 a            | 0 ± 0 a            | 0 ± 0 a           | 0 ± 0 a           | 0 ± 0 a            | 0 ± 0 a            |
| <i>Candidatus<br/>Dadabacteria</i>             | 5 ± 1.53<br>bc     | 1.33 ±<br>0.88 c  | 10.67 ±<br>2.6 a   | 1 ± 0.58<br>c      | 1 ± 1 c           | 2.33 ±<br>0.33 bc | 0.67 ±<br>0.67 c   | 7.33 ±<br>3.84 ab  |
| <i>Candidatus<br/>Edwardsbacte<br/>ria</i>     | 0 ± 0 a            | 0.67 ±<br>0.67 a  | 0.67 ±<br>0.67 a   | 0 ± 0 a            | 1 ± 1 a           | 0.33 ±<br>0.33 a  | 0 ± 0 a            | 0 ± 0 a            |

|                          |          |          |          |          |         |           |           |          |
|--------------------------|----------|----------|----------|----------|---------|-----------|-----------|----------|
| <i>Candidatus</i>        | 9.67 ±   |          | 10 ±     | 5.67 ±   | 0.33 ±  | 16 ± 2.52 |           | 32 ±     |
| <i>Eisenbacteria</i>     | 1.33 bc  | 0 ± 0 d  | 0.58 bc  | 2.96 cd  | 0.33 d  | b         | 3 ± 3 cd  | 6.81 a   |
| <i>Candidatus</i>        | 0.33 ±   |          |          |          |         |           |           |          |
| <i>Fraserbacteria</i>    | 0.33 a   | 0 ± 0 a  | 0 ± 0 a  | 0 ± 0 a  | 0 ± 0 a | 0 ± 0 a   | 0 ± 0 a   | 0 ± 0 a  |
| <i>Candidatus</i>        | 0.67 ±   | 0.67 ±   |          | 0.67 ±   | 1.33 ±  |           | 0.33 ±    | 1 ± 0.58 |
| <i>Glassbacteria</i>     | 0.67 a   | 0.67 a   | 0 ± 0 a  | 0.33 a   | 1.33 a  | 0 ± 0 a   | 0.33 a    | a        |
| <i>Candidatus</i>        | 1 ± 0.58 |          |          |          |         |           |           |          |
| <i>Goldbacteria</i>      | a        | 0 ± 0 b  | 0 ± 0 b  | 0 ± 0 b  | 0 ± 0 b | 0 ± 0 b   | 0 ± 0 b   | 0 ± 0 b  |
| <i>Candidatus</i>        | 0.33 ±   |          |          |          |         |           |           |          |
| <i>Heimdallarchaeota</i> | 0.33 a   | 0 ± 0 a  | 0 ± 0 a  | 0 ± 0 a  | 0 ± 0 a | 0 ± 0 a   | 0 ± 0 a   | 0 ± 0 a  |
| <i>Candidatus</i>        | 3.33 ±   | 0.33 ±   |          |          | 0.67 ±  | 0.67 ±    | 0.67 ±    | 2 ± 1.15 |
| <i>Kaiserbacteria</i>    | 0.67 a   | 0.33 bc  | 0 ± 0 c  | 0 ± 0 c  | 0.67 bc | 0.67 bc   | 0.67 bc   | ab       |
| <i>Candidatus</i>        |          |          |          |          |         |           |           |          |
| <i>Latescibacteria</i>   | 0 ± 0 a  | 0.33 ±   | 0 ± 0 a  | 0 ± 0 a  | 0 ± 0 a | 0 ± 0 a   | 0 ± 0 a   | 0 ± 0 a  |
| <i>a</i>                 |          | 0.33 a   |          |          |         |           |           |          |
| <i>Candidatus</i>        | 0.67 ±   | 1.67 ±   |          |          |         |           |           |          |
| <i>Marinimicrobia</i>    | 0.33 b   | 0.88 a   | 0 ± 0 b  | 0 ± 0 b  | 0 ± 0 b | 0 ± 0 b   | 0 ± 0 b   | 0 ± 0 b  |
| <i>Candidatus</i>        | 0.33 ±   | 0.67 ±   |          |          |         | 0.67 ±    |           |          |
| <i>Melainabacteria</i>   | 0.33 a   | 0.67 a   | 0 ± 0 a  | 0 ± 0 a  | 0 ± 0 a | 0.67 a    | 0 ± 0 a   | 0 ± 0 a  |
| <i>Candidatus</i>        | 0.33 ±   | 0.67 ±   |          |          | 14.33 ± |           | 10 ± 5.29 |          |
| <i>Microgenomates</i>    | 0.33 b   | 0.67 b   | 0 ± 0 b  | 0 ± 0 b  | 5.36 a  | 0 ± 0 b   | a         | 0 ± 0 b  |
| <i>Candidatus</i>        |          |          |          |          |         |           |           |          |
| <i>Nomurabacteria</i>    | 0 ± 0 b  | 2 ± 1.15 | 0 ± 0 b  | 0 ± 0 b  | 0 ± 0 b | 0 ± 0 b   | 0.67 ±    | 1 ± 0.58 |
| <i>a</i>                 |          | a        |          |          |         |           | 0.67 ab   | ab       |
| <i>Candidatus</i>        | 17.67 ±  | 8.67 ±   | 25.67 ±  | 3.33 ±   | 1.67 ±  | 3.33 ±    | 4.33 ±    | 13 ±     |
| <i>Omnitrophica</i>      | 4.63 ab  | 1.2 bc   | 8.84 a   | 2.03 c   | 0.33 c  | 1.2 c     | 3.38 c    | 1.53 bc  |
| <i>Candidatus</i>        | 2.33 ±   | 0.67 ±   | 1.67 ±   | 0.33 ±   | 1.67 ±  |           | 0.33 ±    | 4 ± 1.15 |
| <i>Poribacteria</i>      | 0.88 ab  | 0.67 bc  | 0.88 bc  | 0.33 bc  | 0.33 bc | 0 ± 0 c   | 0.33 bc   | a        |
| <i>Candidatus</i>        | 0.67 ±   | 0.67 ±   | 2.33 ±   |          | 0.33 ±  |           | 0.67 ±    | 3.67 ±   |
| <i>Raymondbacteria</i>   | 0.67 a   | 0.33 a   | 2.33 a   | 1 ± 1 a  | 0.33 a  | 0 ± 0 a   | 0.67 a    | 2.33 a   |
| <i>Candidatus</i>        |          |          |          |          |         |           |           |          |
| <i>Roizmanbacteria</i>   | 0 ± 0 b  | 0.67 ±   | 1 ± 0.58 |          |         |           |           |          |
| <i>a</i>                 |          | 0.67 ab  | a        | 0 ± 0 b  | 0 ± 0 b | 0 ± 0 b   | 0 ± 0 b   | 0 ± 0 b  |
| <i>Candidatus</i>        | 864 ±    | 274.33 ± | 1088.67  | 1016.33  | 39.33 ± | 658.67 ±  | 236.33 ±  | 1842 ±   |
| <i>Rokubacteria</i>      | 212.15 b | 81.53    | ± 91 b   | ± 215.05 | 4.33 d  | 39.39 bc  | 133.32    | 232.17 a |
|                          |          | cd       |          | b        |         |           | cd        |          |

|                       |          |          |          |           |          |          |           |          |
|-----------------------|----------|----------|----------|-----------|----------|----------|-----------|----------|
| <i>Candidatus</i>     | 0.67 ±   | 0.33 ±   | 1 ± 0.58 | 1.67 ±    |          | 1.33 ±   | 2.33 ±    | 0.67 ±   |
| <i>Schekmanbact</i>   | 0.67 a   | 0.33 a   | a        | 1.2 a     | 0 ± 0 a  | 0.33 a   | 1.45 a    | 0.67 a   |
| <i>eria</i>           |          |          |          |           |          |          |           |          |
| <i>Candidatus</i>     | 0.33 ±   |          |          |           |          | 0.67 ±   |           | 1.33 ±   |
| <i>Sumerlaeota</i>    | 0.33 a   | 0 ± 0 a  | 0 ± 0 a  | 0 ± 0 a   | 0 ± 0 a  | 0.67 a   | 0 ± 0 a   | 1.33 a   |
| <i>Candidatus</i>     | 9 ± 5.51 | 7.33 ±   | 21 ±     | 9.33 ±    | 1.33 ±   | 3.33 ±   | 1.67 ±    | 12.67 ±  |
| <i>Tectomicrobia</i>  | bc       | 4.84 bc  | 6.11 a   | 3.76 bc   | 0.67 c   | 1.33 bc  | 1.67 bc   | 1.76 ab  |
| <i>Candidatus</i>     | 1 ± 0.58 |          |          |           |          |          |           |          |
| <i>Woesebacteria</i>  | a        | 0 ± 0 b  | 0 ± 0 b  | 0 ± 0 b   | 0 ± 0 b  | 0 ± 0 b  | 0 ± 0 b   | 0 ± 0 b  |
|                       |          |          |          |           |          |          |           |          |
| <i>Chlamydiae</i>     | 0.33 ±   |          |          |           |          | 1.33 ±   |           | 0.33 ±   |
|                       | 0.33 a   | 0 ± 0 a  | 0 ± 0 a  | 0 ± 0 a   | 0 ± 0 a  | 1.33 a   | 0 ± 0 a   | 0.33 a   |
|                       |          |          |          |           |          |          |           |          |
| <i>Chlorobi</i>       | 2 ± 0.58 | 2 ± 1.53 | 3.33 ±   | 0.67 ±    |          | 1 ± 0.58 | 0.67 ±    | 6.33 ±   |
|                       | b        | b        | 1.76 ab  | 0.67 b    | 0 ± 0 b  | b        | 0.67 b    | 2.19 a   |
|                       |          |          |          |           |          |          |           |          |
| <i>Chloroflexi</i>    | 133 ±    | 163 ±    | 586.33 ± | 28.33 ±   | 41.67 ±  | 150.67 ± | 252.33 ±  | 81 ±     |
|                       | 14.73 b  | 40.51 b  | 130.49 a | 7.69 b    | 10.4 b   | 8.29 b   | 199.9 b   | 23.86 b  |
| <i>Chrysiogenete</i>  | 1 ± 0.58 | 0.67 ±   | 3.67 ±   | 1.33 ±    | 0.33 ±   | 0.67 ±   |           | 5 ± 0.58 |
| <i>s</i>              | bc       | 0.33 c   | 1.86 ab  | 1.33 bc   | 0.33 c   | 0.67 c   | 0 ± 0 c   | a        |
| <i>Crenarchaeot</i>   | 0.33 ±   | 1.33 ±   | 3.33 ±   |           |          |          | 0.33 ±    |          |
| <i>a</i>              | 0.33 b   | 0.67 b   | 1.33 a   | 0 ± 0 b   | 0 ± 0 b  | 0 ± 0 b  | 0.33 b    | 0 ± 0 b  |
| <i>Cyanobacteri</i>   | 65.33 ±  | 41.33 ±  | 72.33 ±  | 30 ± 5.29 | 35.67 ±  | 32.67 ±  | 44 ± 6.24 | 95.67 ±  |
| <i>a</i>              | 8.97 b   | 1.86 c   | 9.28 b   | c         | 2.19 c   | 3.76 c   | c         | 8.88 a   |
| <i>Deferribactere</i> | 1.67 ±   | 2.67 ±   | 5.33 ±   |           |          | 1 ± 0.58 |           | 3 ± 1.73 |
| <i>s</i>              | 1.2 ab   | 1.76 ab  | 2.33 a   | 0 ± 0 b   | 0 ± 0 b  | b        | 0 ± 0 b   | ab       |
| <i>Deinococcus-</i>   | 3.67 ±   | 5.33 ±   | 3.67 ±   | 0.67 ±    | 2.33 ±   | 2.67 ±   |           |          |
| <i>Thermus</i>        | 1.33 a   | 2.73 a   | 2.73 a   | 0.67 a    | 0.67 a   | 1.33 a   | 4 ± 2 a   | 2 ± 1 a  |
|                       |          |          |          |           |          |          |           |          |
| <i>Elusimicrobia</i>  | 9.67 ±   | 5 ± 0.58 | 8.33 ±   | 4.33 ±    |          | 6.33 ±   | 8.67 ±    | 18.33 ±  |
|                       | 3.71 ab  | b        | 2.91 b   | 0.67 b    | 6 ± 2 b  | 1.2 b    | 4.37 b    | 4.63 a   |
| <i>Euryarchaeot</i>   | 14.33 ±  | 23.67 ±  | 18.33 ±  | 5 ± 1.53  | 5 ± 0.58 | 2 ± 0.58 | 9.67 ±    | 6.33 ±   |
| <i>a</i>              | 0.88 abc | 9.28 a   | 3.33 ab  | bc        | bc       | c        | 8.17 bc   | 0.88 bc  |
|                       |          |          |          |           |          |          |           |          |
| <i>Firmicutes</i>     | 72.33 ±  | 60.67 ±  | 47 ±     | 20 ± 1.15 | 14.33 ±  | 19.67 ±  | 30 ± 3.06 | 23 ±     |
|                       | 14.68 a  | 11.67 ab | 5.03 bc  | d         | 1.2 d    | 6.64 d   | cd        | 6.81 d   |
| <i>Gemmatimon</i>     | 104.33 ± | 180 ±    | 608 ±    | 94 ±      | 75.67 ±  | 199.33 ± | 148.33 ±  | 84 ± 19  |
| <i>adetes</i>         | 15.25 b  | 41.88 b  | 196.3 a  | 30.35 b   | 20.3 b   | 46.94 b  | 45.17 b   | b        |
| <i>Ignavibacteri</i>  | 9.67 ±   | 7 ± 4.04 | 24.33 ±  | 12.67 ±   | 16.67 ±  | 15.33 ±  | 5 ± 2.31  | 16.67 ±  |
| <i>ae</i>             | 0.33 bcd | cd       | 1.33 a   | 4.81 bcd  | 4.1 ab   | 1.45 bc  | d         | 1.86 ab  |
|                       |          |          |          |           |          |          |           |          |
| <i>Lentisphaerae</i>  | 5.33 ±   | 1.33 ±   | 9.33 ±   |           | 0.67 ±   |          | 1.33 ±    | 7.33 ±   |
|                       | 0.33 bc  | 0.88 d   | 1.33 a   | 1 ± 1 d   | 0.67 d   | 2 ± 2 cd | 0.67 d    | 2.33 ab  |
|                       |          |          |          |           |          |          |           |          |
| <i>Nitrospinae</i>    | 8 ± 1.15 | 5.33 ±   | 16.33 ±  | 3.67 ±    |          | 2 ± 1.15 | 3.33 ±    | 9.67 ±   |
|                       | bc       | 2.6 bcd  | 3.76 a   | 2.03 bcd  | 0 ± 0 d  | cd       | 2.4 cd    | 1.2 b    |
|                       |          |          |          |           |          |          |           |          |
| <i>Nitrospirae</i>    | 122.33 ± | 27.67 ±  | 75 ±     | 190 ±     | 10.67 ±  | 89.33 ±  | 13.33 ±   | 321.67 ± |
|                       | 7.36 bc  | 4.67 c   | 17.95 bc | 122.98 ab | 3.53 c   | 12.68 bc | 2.91 c    | 74.92 a  |

|                                                                         |                                |                          |                          |                           |                          |                           |                           |                           |                          |
|-------------------------------------------------------------------------|--------------------------------|--------------------------|--------------------------|---------------------------|--------------------------|---------------------------|---------------------------|---------------------------|--------------------------|
| <b>P-<br/>solubi<br/>lizatio<br/>n and<br/>miner<br/>alizati<br/>on</b> | <i>Planctomycetes</i>          | 85.33 ±<br>26.36<br>bcd  | 67 ±<br>8.14 cd          | 148.33 ±<br>19.32 ab      | 76.67 ±<br>16.5 cd       | 122.33 ±<br>25.78<br>abc  | 49.67 ±<br>3.18 d         | 110.33 ±<br>19.46<br>abcd | 167.67 ±<br>38.92 a      |
|                                                                         | <i>Proteobacteria</i>          | 3789.33<br>± 338.96<br>b | 3673.67<br>± 428.22<br>b | 3601.67<br>± 401.76<br>b  | 3281.67<br>± 623.33<br>b | 3807.67<br>± 405.83<br>b  | 3146.33<br>± 136.67<br>b  | 8392.67<br>± 2162.9<br>a  | 4078.67<br>± 272.13<br>b |
|                                                                         | <i>Spirochaetes</i>            | 4.33 ±<br>1.86 a         | 5.67 ±<br>3.67 a         | 2.67 ±<br>1.67 a          | 2 ± 1 a                  | 1.33 ±<br>0.33 a          | 2 ± 1.53<br>a             | 5.67 ±<br>0.88 a          | 2.67 ±<br>1.76 a         |
|                                                                         | <i>Synergistetes</i>           | 0.33 ±<br>0.33 a         | 0 ± 0 a                  | 0 ± 0 a                   | 0 ± 0 a                  | 0 ± 0 a                   | 0.67 ±<br>0.67 a          | 0.33 ±<br>0.33 a          | 0 ± 0 a                  |
|                                                                         | <i>Thaumarchaeota</i>          | 24.33 ±<br>15.06 ab      | 10 ±<br>1.53 ab          | 22.33 ±<br>10.74 ab       | 0 ± 0 b                  | 1.33 ±<br>0.67 ab         | 26.67 ±<br>14.11 a        | 2 ± 1.15<br>ab            | 27.67 ±<br>9.24 a        |
|                                                                         | <i>Thermodesulfobacteria</i>   | 1.33 ±<br>0.88 a         | 0.67 ±<br>0.67 a         | 0 ± 0 a                   | 0.33 ±<br>0.33 a         | 0.33 ±<br>0.33 a          | 3 ± 3 a                   | 1 ± 1 a                   | 1.33 ±<br>1.33 a         |
|                                                                         | <i>Thermotogae</i>             | 0 ± 0 a                  | 0.67 ±<br>0.67 a         | 0 ± 0 a                   | 0 ± 0 a                  | 0 ± 0 a                   | 0 ± 0 a                   | 1 ± 1 a                   | 0.67 ±<br>0.67 a         |
|                                                                         | <i>Verrucomicrobia</i>         | 1428.67<br>± 226.52<br>a | 449 ±<br>55.33<br>bcd    | 278.33 ±<br>97.89 cd      | 620.33 ±<br>228.47<br>bc | 322.67 ±<br>81.61 cd      | 102.33 ±<br>9.39 d        | 757.33 ±<br>153.95 b      | 518 ±<br>53.27 bc        |
|                                                                         | <i>Abditibacteriota</i>        | 1.33 ±<br>1.33 a         | 2.33 ±<br>1.2 a          | 0.67 ±<br>0.67 a          | 0 ± 0 a                  | 1.67 ±<br>0.88 a          | 0.67 ±<br>0.67 a          | 0 ± 0 a                   | 0.33 ±<br>0.33 a         |
|                                                                         | <i>Acidobacteria</i>           | 2923 ±<br>331.69<br>bcde | 1451 ±<br>238.68 e       | 3998.33<br>± 406.8<br>abc | 2554 ±<br>615.56<br>cde  | 4300.67<br>± 410.28<br>ab | 2224.67<br>± 360.97<br>de | 3056 ±<br>639.66<br>bcd   | 5494 ±<br>915.44 a       |
|                                                                         | <i>Actinobacteria</i>          | 197.67 ±<br>25.05 c      | 401.33 ±<br>13.72<br>ab  | 326.33 ±<br>61.26 b       | 66.33 ±<br>21.71 d       | 158.33 ±<br>42.91 cd      | 194.67 ±<br>33.51 c       | 471.67 ±<br>65.08 a       | 87.33 ±<br>26.43 cd      |
|                                                                         | <i>Armatimonadetes</i>         | 0.67 ±<br>0.67 ab        | 0.67 ±<br>0.33 ab        | 1.67 ±<br>0.88 ab         | 4.33 ±<br>2.33 a         | 0 ± 0 b                   | 0 ± 0 b                   | 3 ± 2.52<br>ab            | 0 ± 0 b                  |
|                                                                         | <i>Ascomycota</i>              | 0.33 ±<br>0.33 ab        | 1.67 ±<br>1.2 a          | 0 ± 0 b                   | 1 ± 0.58<br>ab           | 0 ± 0 b                   | 0 ± 0 b                   | 0 ± 0 b                   | 0 ± 0 b                  |
|                                                                         | <i>Bacteroidetes</i>           | 101.33 ±<br>24.11 a      | 42 ±<br>9.29 bc          | 109.33 ±<br>14.52 a       | 40 ± 4.36<br>c           | 60 ± 4.16<br>bc           | 39.33 ±<br>7.84 c         | 80 ±<br>10.44 ab          | 75 ±<br>15.72<br>abc     |
|                                                                         | <i>Balneolaeota</i>            | 0.67 ±<br>0.67 b         | 0 ± 0 b                  | 3.33 ±<br>1.33 a          | 0 ± 0 b                  | 0 ± 0 b                   | 0 ± 0 b                   | 0.67 ±<br>0.67 b          | 0 ± 0 b                  |
|                                                                         | <i>Calditrichaeota</i>         | 1.33 ±<br>0.67 ab        | 0 ± 0 b                  | 0 ± 0 b                   | 3.33 ±<br>1.76 a         | 0 ± 0 b                   | 0 ± 0 b                   | 0.33 ±<br>0.33 b          | 0 ± 0 b                  |
|                                                                         | <i>Candidate division NC10</i> | 0.33 ±<br>0.33 b         | 0 ± 0 b                  | 4.33 ±<br>1.67 a          | 0 ± 0 b                  | 0 ± 0 b                   | 0 ± 0 b                   | 0 ± 0 b                   | 0 ± 0 b                  |

|                                 |                          |                          |                     |                          |                          |                         |                        |                          |
|---------------------------------|--------------------------|--------------------------|---------------------|--------------------------|--------------------------|-------------------------|------------------------|--------------------------|
| <i>Candidate</i>                |                          |                          |                     |                          |                          |                         |                        |                          |
| <i>division</i>                 | 0.33 ±<br>0.33 a         | 0 ± 0 a                  | 0 ± 0 a             | 0 ± 0 a                  | 0 ± 0 a                  | 0 ± 0 a                 | 0.33 ±<br>0.33 a       | 0 ± 0 a                  |
| <i>Zixibacteria</i>             |                          |                          |                     |                          |                          |                         |                        |                          |
| <i>Candidatus</i>               |                          | 0.67 ±                   | 3.33 ±              | 0.67 ±                   | 0.67 ±                   |                         | 2.33 ±                 | 0.67 ±                   |
| <i>Glassbacteria</i>            | 0 ± 0 b                  | 0.67 ab                  | 1.2 a               | 0.67 ab                  | 0.67 ab                  | 0 ± 0 b                 | 1.86 ab                | 0.33 ab                  |
| <i>Candidatus</i>               |                          |                          |                     |                          |                          |                         |                        |                          |
| <i>Hydrogeneden-<br/>tes</i>    | 2 ± 1.15<br>ab           | 5 ± 1 ab                 | 4.33 ±<br>1.45 ab   | 2 ± 1.15<br>ab           | 0.67 ±<br>0.67 b         | 5 ± 2 ab                | 3.67 ±<br>0.67 ab      | 7.33 ±<br>4.37 a         |
| <i>Candidatus</i>               |                          |                          |                     |                          |                          |                         |                        |                          |
| <i>Kerfeldbacteri-<br/>a</i>    | 0.33 ±<br>0.33 a         | 0 ± 0 a                  | 0 ± 0 a             | 0 ± 0 a                  | 0 ± 0 a                  | 0 ± 0 a                 | 0 ± 0 a                | 0 ± 0 a                  |
| <i>Candidatus</i>               |                          |                          |                     |                          |                          |                         |                        |                          |
| <i>Marinimicrob-<br/>ia</i>     | 24 ±<br>8.33 bc          | 7.33 ±<br>1.76 d         | 58 ±<br>7.77 a      | 8.33 ±<br>4.48 cd        | 5 ± 1.53<br>d            | 17 ± 4.73<br>cd         | 14 ± 6.35<br>cd        | 39 ±<br>4.16 b           |
| <i>Candidatus</i>               | 2.67 ±                   |                          |                     | 2.67 ±                   |                          |                         |                        | 5.67 ±                   |
| <i>Parcubacteria</i>            | 2.67 ab                  | 0 ± 0 b                  | 0 ± 0 b             | 1.45 ab                  | 0 ± 0 b                  | 0 ± 0 b                 | 0 ± 0 b                | 2.85 a                   |
| <i>Candidatus</i>               | 152.67 ±                 | 37.33 ±                  | 173.67 ±            | 166.33 ±                 | 9.33 ±                   | 99.33 ±                 | 40 ±                   | 639.33 ±                 |
| <i>Rokubacteria</i>             | 60.15 bc                 | 11.7 cd                  | 7.42 b              | 41.16 bc                 | 3.53 d                   | 10.74<br>bcd            | 24.44 cd               | 95.73 a                  |
| <i>Chloroflexi</i>              | 29.33 ±<br>5.04 b        | 40 ±<br>4.04 b           | 127.67 ±<br>28.87 a | 7 ± 2.08<br>b            | 10.33 ±<br>3.18 b        | 24.33 ±<br>3.38 b       | 46.67 ±<br>34.7 b      | 18 ±<br>7.55 b           |
| <i>Cyanobacteri-<br/>a</i>      | 5.67 ±<br>2.73 b         | 12.67 ±<br>5.61 ab       | 18.33 ±<br>3.76 a   | 4 ± 1.15<br>b            | 1.67 ±<br>1.67 b         | 5 ± 1 b                 | 8.33 ±<br>4.33 ab      | 9.33 ±<br>6.89 ab        |
| <i>Deinococcus-<br/>Thermus</i> | 0.67 ±<br>0.67 b         | 2.67 ±<br>0.67 a         | 0.67 ±<br>0.67 b    | 0 ± 0 b                  | 0 ± 0 b                  | 0 ± 0 b                 | 0 ± 0 b                | 0 ± 0 b                  |
| <i>Elusimicrobia</i>            | 0.33 ±<br>0.33 a         | 0 ± 0 a                  | 0 ± 0 a             | 0 ± 0 a                  | 0 ± 0 a                  | 0 ± 0 a                 | 0 ± 0 a                | 0 ± 0 a                  |
| <i>Euryarchaeot-<br/>a</i>      | 0 ± 0 a                  | 1 ± 1 a                  | 0 ± 0 a             | 0 ± 0 a                  | 0 ± 0 a                  | 0 ± 0 a                 | 0 ± 0 a                | 0 ± 0 a                  |
| <i>Firmicutes</i>               | 7 ± 3.21<br>a            | 5 ± 2.52<br>ab           | 5 ± 1.53<br>ab      | 0.33 ±<br>0.33 b         | 0.67 ±<br>0.67 b         | 1.33 ±<br>0.88 b        | 4 ± 2.31<br>ab         | 2.67 ±<br>1.33 ab        |
| <i>Gemmatimon-<br/>adetes</i>   | 131.67 ±<br>34.91 b      | 151 ±<br>13.65 b         | 697 ±<br>130.12 a   | 91 ±<br>32.05 b          | 54.33 ±<br>19.97 b       | 184 ±<br>44.07 b        | 155 ±<br>79.62 b       | 208.67 ±<br>14.84 b      |
| <i>Nanoarchaeot-<br/>a</i>      | 0.33 ±<br>0.33 a         | 0 ± 0 a                  | 0 ± 0 a             | 0 ± 0 a                  | 0 ± 0 a                  | 0 ± 0 a                 | 0 ± 0 a                | 0 ± 0 a                  |
| <i>Nitrospirae</i>              | 51 ±<br>12.66 b          | 2.67 ±<br>1.76 c         | 5 ± 1 c             | 50.33 ±<br>25.69 b       | 2.33 ±<br>1.86 c         | 29.67 ±<br>5.78 bc      | 1.67 ±<br>1.2 c        | 123.33 ±<br>20.95 a      |
| <i>Planctomycet-<br/>es</i>     | 13.67 ±<br>4.26 c        | 21 ± 4<br>bc             | 26 ±<br>9.54 abc    | 11 ± 5.13<br>c           | 41.67 ±<br>9.96 ab       | 17.33 ±<br>9.94 c       | 45 ±<br>10.02 a        | 28.33 ±<br>7.22 abc      |
| <i>Proteobacteri-<br/>a</i>     | 1305.33<br>± 161.72<br>b | 1658.33<br>± 295.85<br>b | 1309 ±<br>159.8 b   | 1342.67<br>± 355.94<br>b | 1558.33<br>± 247.92<br>b | 1012.33<br>± 144.1<br>b | 4466 ±<br>1404.28<br>a | 1547.33<br>± 129.35<br>b |

|                             |                   |                     |                     |                     |                      |                    |                     |                     |
|-----------------------------|-------------------|---------------------|---------------------|---------------------|----------------------|--------------------|---------------------|---------------------|
| <i>Rhodophyta</i>           | 0 ± 0 a           | 0.33 ±<br>0.33 a    | 1 ± 1 a             | 0 ± 0 a             | 0 ± 0 a              | 0 ± 0 a            | 0 ± 0 a             | 0 ± 0 a             |
| <i>Rhodotherma<br/>eota</i> | 0.67 ±<br>0.67 a  | 0 ± 0 a             | 0 ± 0 a             | 0 ± 0 a             | 0 ± 0 a              | 0 ± 0 a            | 0 ± 0 a             | 0 ± 0 a             |
| <i>Spirochaetes</i>         | 0 ± 0 a           | 0.67 ±<br>0.67 a    | 0 ± 0 a             | 0 ± 0 a             | 0 ± 0 a              | 0 ± 0 a            | 0 ± 0 a             | 0 ± 0 a             |
| <i>Thaumarchae<br/>ota</i>  | 2.33 ±<br>2.33 b  | 0 ± 0 b             | 7 ± 3.61<br>ab      | 0 ± 0 b             | 0 ± 0 b              | 12 ± 6.03<br>a     | 0 ± 0 b             | 1.67 ±<br>1.2 b     |
| <i>Thermotogae</i>          | 0.67 ±<br>0.67 bc | 5 ± 1.53<br>a       | 3.67 ±<br>0.33 ab   | 0 ± 0 c             | 0 ± 0 c              | 2.67 ±<br>1.33 abc | 2.67 ±<br>2.67 abc  | 0 ± 0 c             |
| <i>Verrucomicro<br/>bia</i> | 406 ±<br>70.55 a  | 85.33 ±<br>19.22 bc | 88.33 ±<br>31.83 bc | 174.33 ±<br>68.44 b | 110.33 ±<br>32.27 bc | 12 ± 3.46<br>c     | 200.33 ±<br>53.31 b | 162.67 ±<br>11.89 b |
